# Supplementary material
Source: Springer Nature journal article supplement (https://www.springermedizin.de/resource/supplementary/12906_2001_8_MOESM5_ESM.pdf/9519316)

**A IFN $\gamma$** 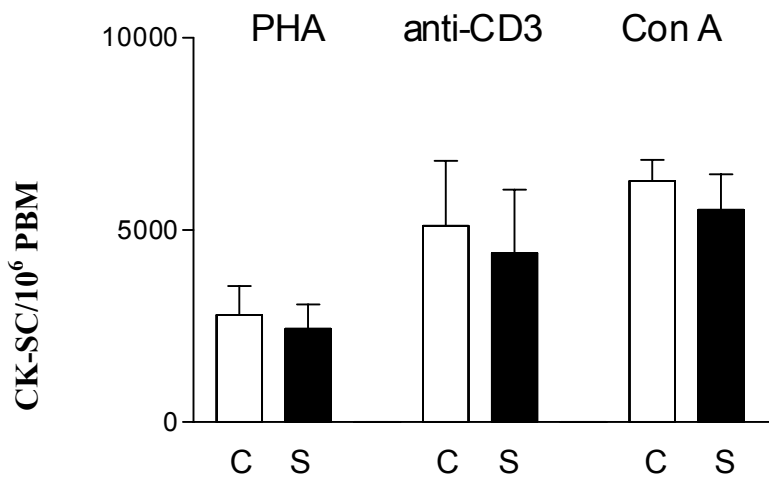**B IL10**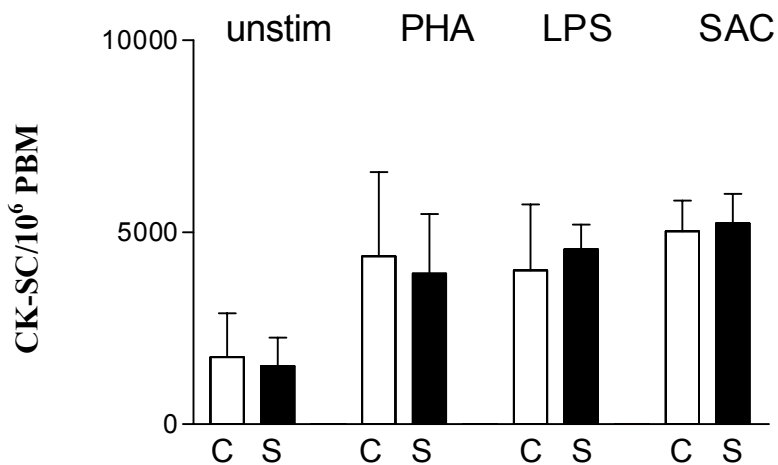**C IFN $\gamma$  : IL10 (PHA)**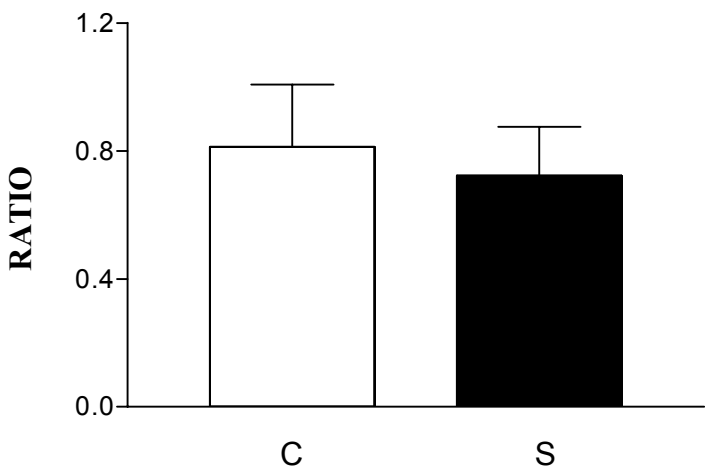

Supplement: MOESM5 [file 9519316]
